# Supplementary material for: Hierarchical hollow spheres composed of ultrathin Fe2O3 nanosheets for lithium storage and photocatalytic water oxidation
Source: Royal Society of Chemistry journal article supplement (doi:10.1039/c2ee24148j), 2013-01-01
Supplement: c2ee24148j.pdf [file c2ee24148j.pdf]

## Enlarged figures used in this paper

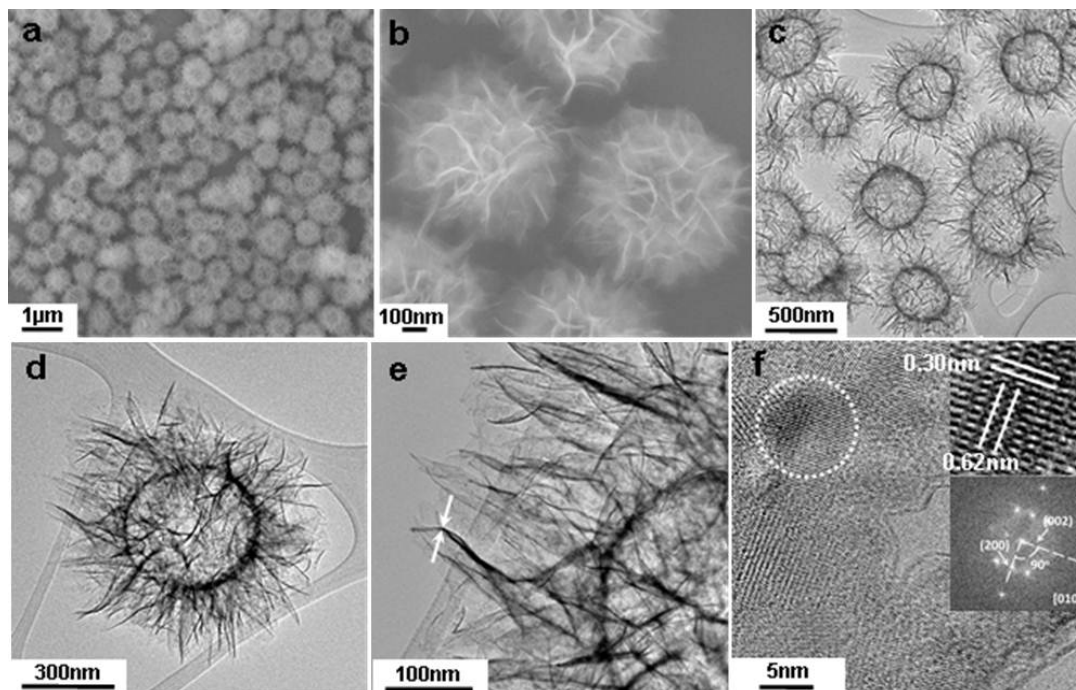

**Figure 1** (a-b) FESEM and (c-f) TEM images of hierarchical hollow spheres of FeOOH composed of ultrathin nanosheets. The arrows in Figure 1e indicate the thickness of a wrinkle in nanosheets. Insets in Figure 1f: (upper) HRTEM image from the circled area; (low) the corresponding FFT image indexed to the [010] zone

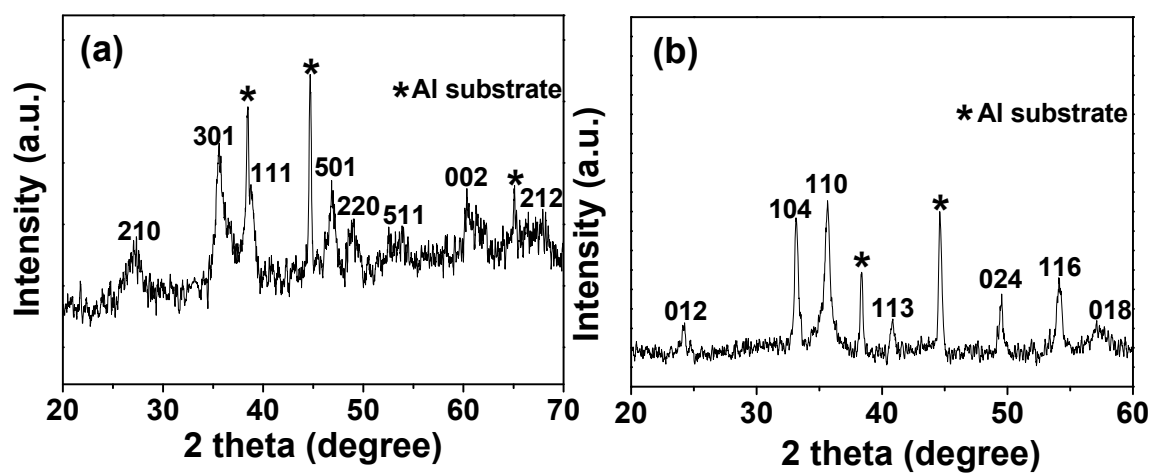

**Figure 2** (a) X-ray diffraction patterns of hierarchical hollow spheres of FeOOH and (b) the hierarchical hollow spheres of Fe<sub>2</sub>O<sub>3</sub> obtained after annealing at 500 °C for 10 minutes in air

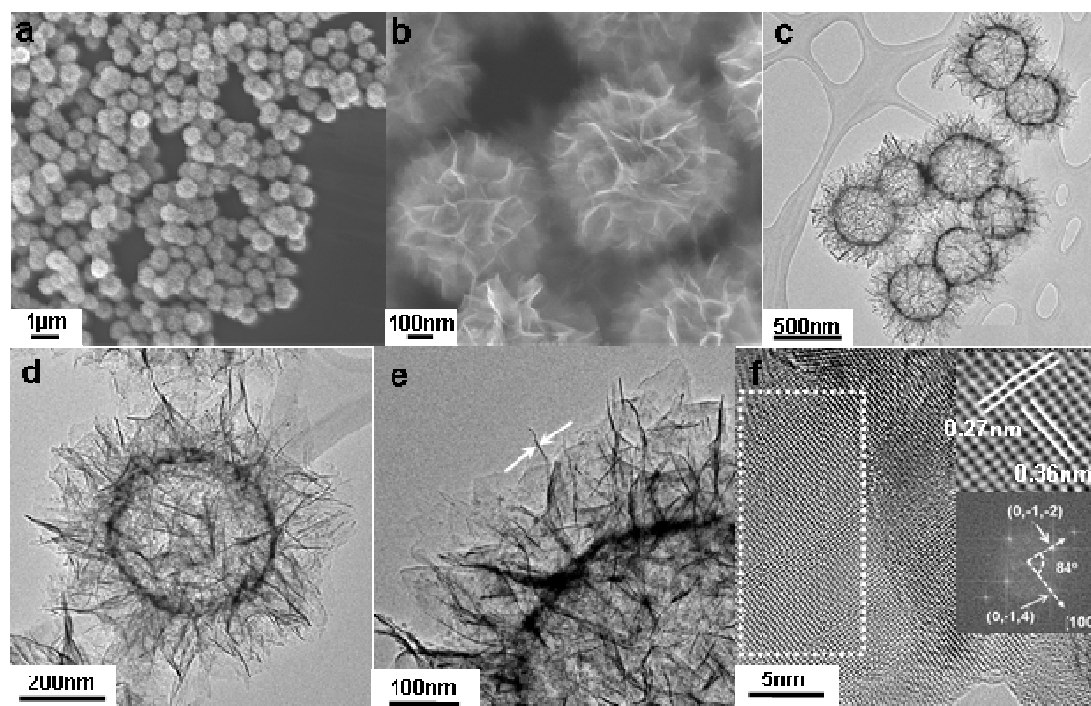

**Figure 3** (a-b) FESEM images and (c-f) TEM images of hierarchical hollow spheres of  $\alpha$ - $\text{Fe}_2\text{O}_3$  composed of ultrathin nanosheets. The arrows in Figure 2e indicate the thickness of a wrinkle in nanosheets. Insets in Figure 2f: (upper) HRTEM image from the rectangle area; (low) the corresponding FFT image indexed to the [100] zone

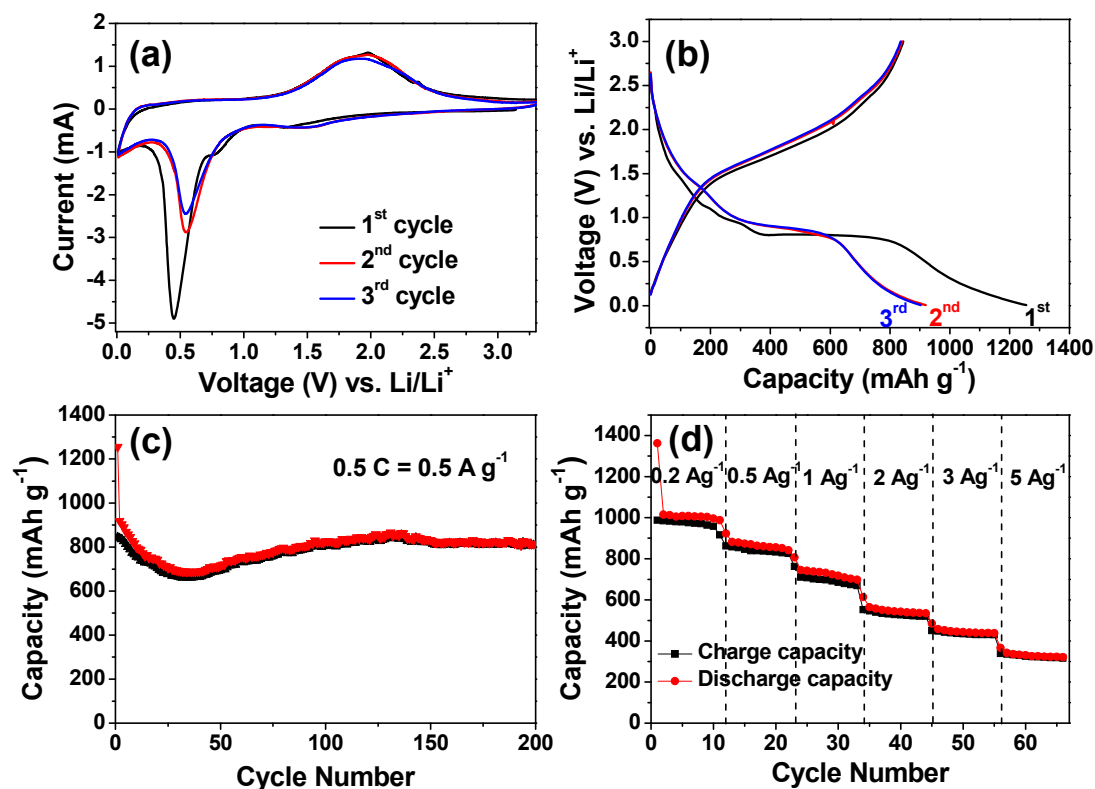

**Figure 4** (a) Representative CV curves of the hierarchical hollow spheres of  $\alpha$ -Fe<sub>2</sub>O<sub>3</sub> electrode at a scan rate of 0.5 mV s<sup>-1</sup> for the first, second, and third cycles, (b) Charge-discharge voltage profiles of the hierarchical hollow spheres of  $\alpha$ -Fe<sub>2</sub>O<sub>3</sub> electrode for the first, second and third cycles at a current density of 0.5 A g<sup>-1</sup> (0.5 C), (c) Cycling performance of the hierarchical hollow spheres of  $\alpha$ -Fe<sub>2</sub>O<sub>3</sub> at a current density of 0.5 A g<sup>-1</sup> (0.5 C), (d) Cycling performance of the hierarchical hollow spheres of  $\alpha$ -Fe<sub>2</sub>O<sub>3</sub> electrode at different current rates. Here, all cycling measurements were conducted within a voltage window of 0.01-3.0 V and 1 C is equal to 1007 mA g<sup>-1</sup>

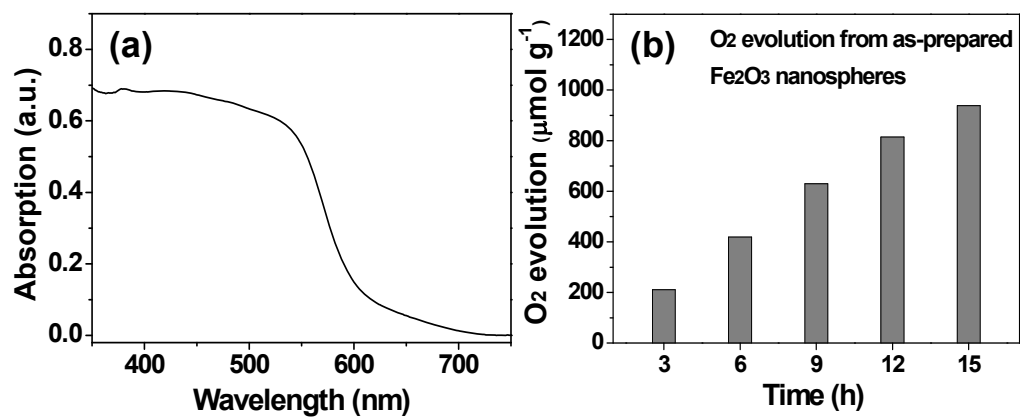

**Figure 5** (a) UV-Vis absorption spectrum on hierarchical hollow sphere-based film obtained by spin coating, (b) O<sub>2</sub> evolution from hierarchical hollow spheres of  $\alpha$ -Fe<sub>2</sub>O<sub>3</sub> composed of ultrathin nanosheets at room temperature

## Electronic Supplementary Information

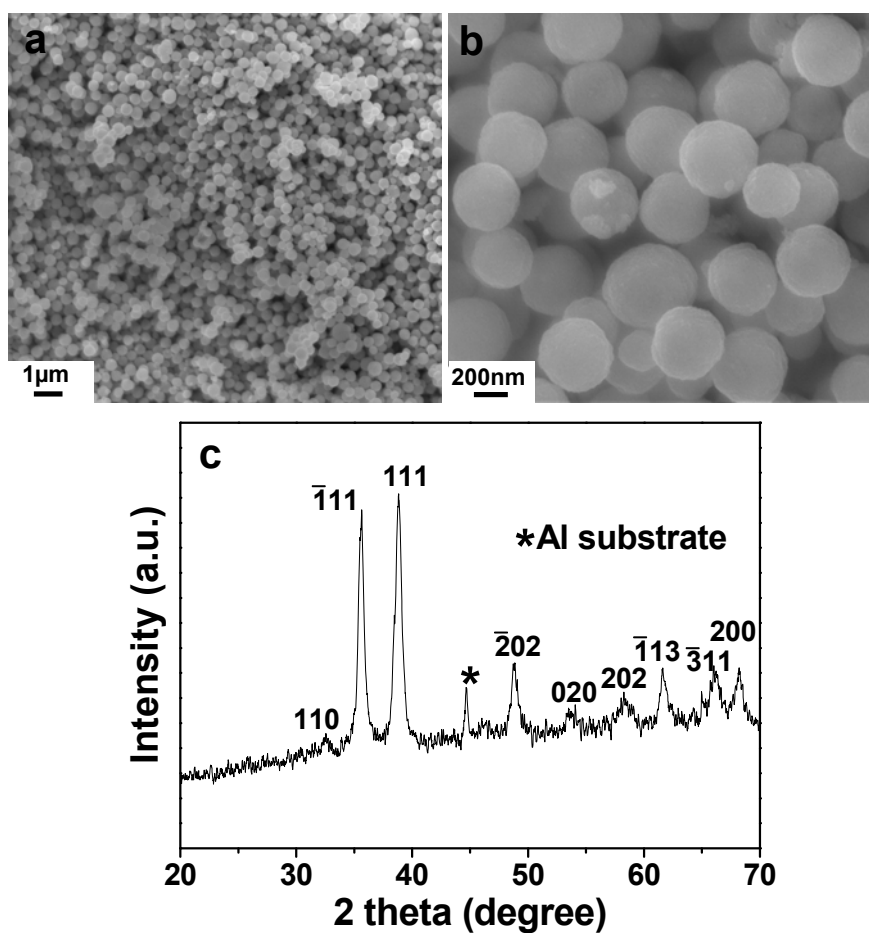

**Figure S1** (a-b) FESEM images and (c) X-ray diffraction pattern of CuO spheres

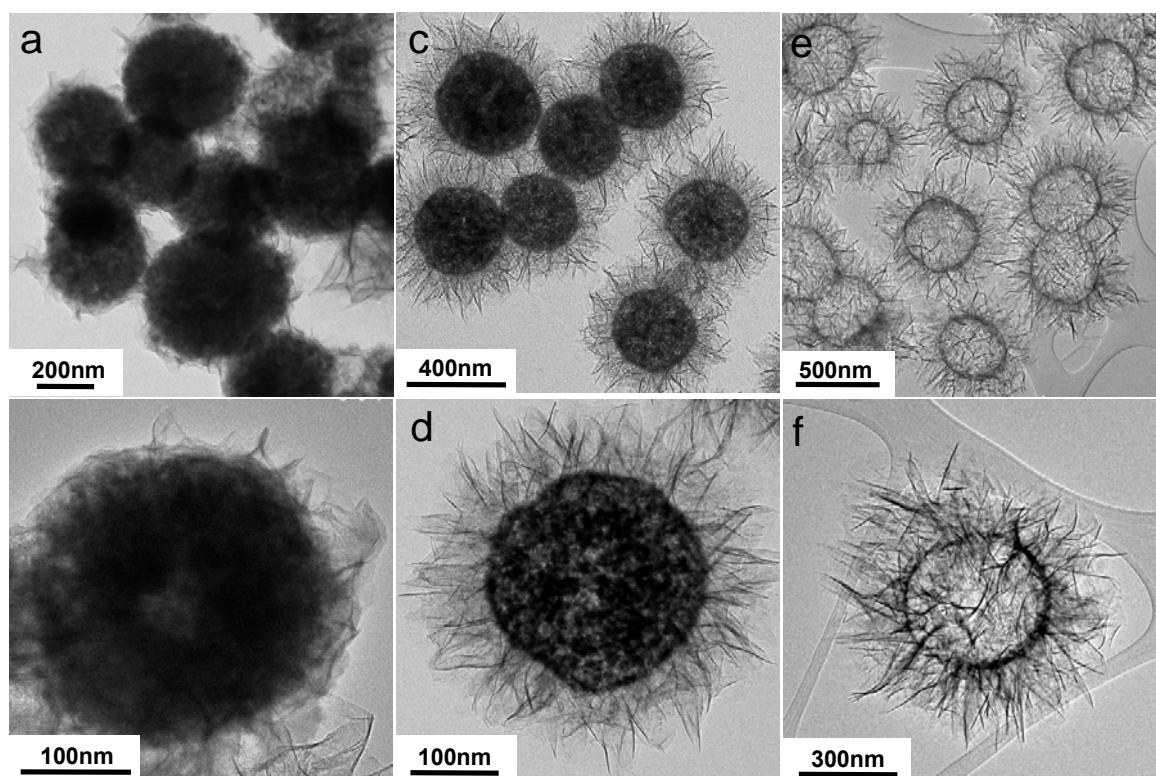

**Figure S2** TEM images of the samples obtained after chemical reaction for (a-b) 15 minutes, (c-d) 30 minutes and (e-f) 60 minutes

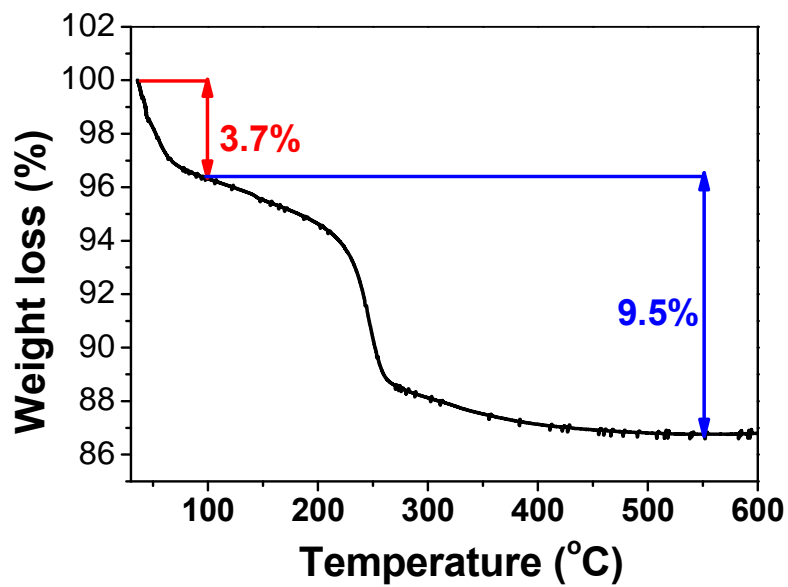

**Figure S3** Thermogravimetry analyses (TGA) of the as-prepared FeOOH under an air flow with a heating rate of  $10\text{ }^{\circ}\text{C min}^{-1}$ . The weight loss of 9.5% is consistent with result calculated from the reaction:  $\text{FeOOH} \rightarrow \text{Fe}_2\text{O}_3$



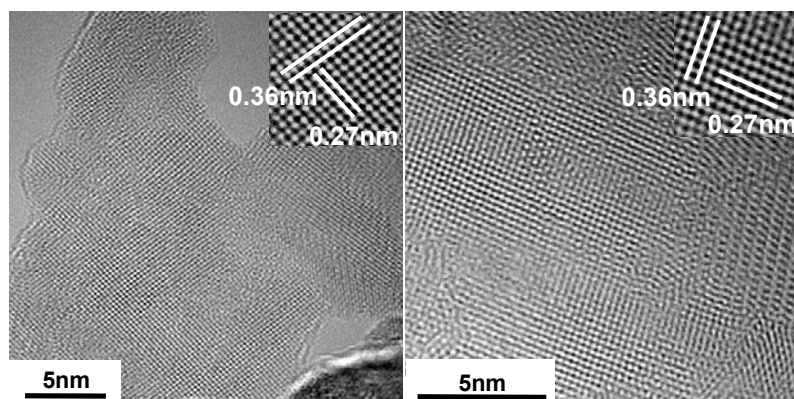

**Figure S4** TEM and HRTEM images from different nanosheets of hierarchical hollow  $\alpha$ - $\text{Fe}_2\text{O}_3$  spheres, showing the same lattice distances of 0.27 and 0.36 nm, corresponding to (104) and (012) planes of  $\alpha$ - $\text{Fe}_2\text{O}_3$ , respectively. This result is well consistent with that shown in Figure 2f

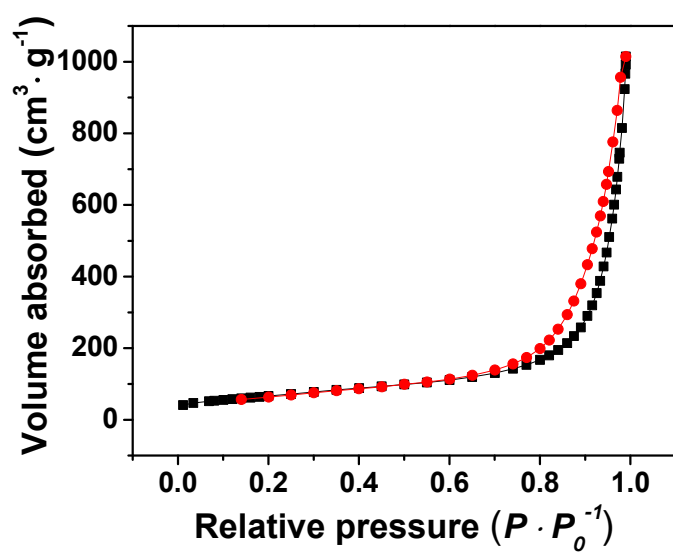

**Figure S5** Nitrogen adsorption and desorption isotherms measured at 77 K for hierarchical hollow  $\alpha$ -Fe<sub>2</sub>O<sub>3</sub> spheres and the specific surface area is 139.5 m<sup>2</sup>/g, which was calculated using the Brunauer-Emmett-Teller (BET) method.

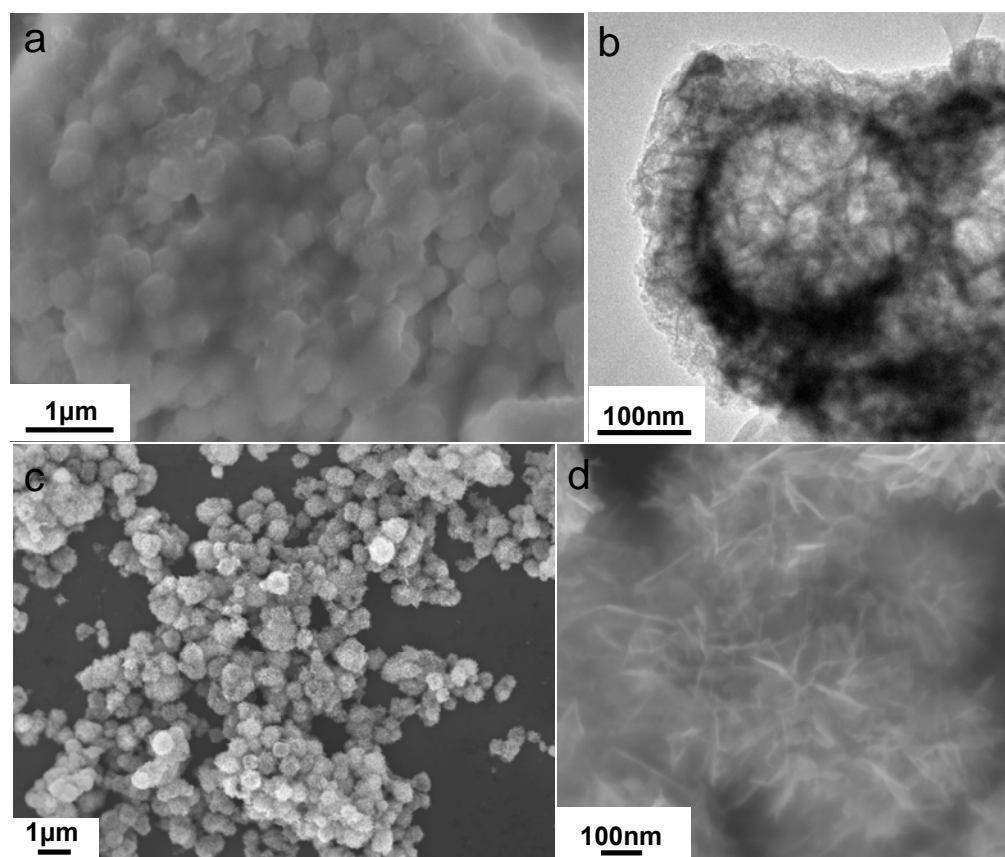

**Figure S6** FESEM and TEM images of the hierarchical hollow spheres of  $\alpha$ - $\text{Fe}_2\text{O}_3$  electrodes (a-b) after 200 cycles cycling test and (c-d) after photocatalytic water oxidation test

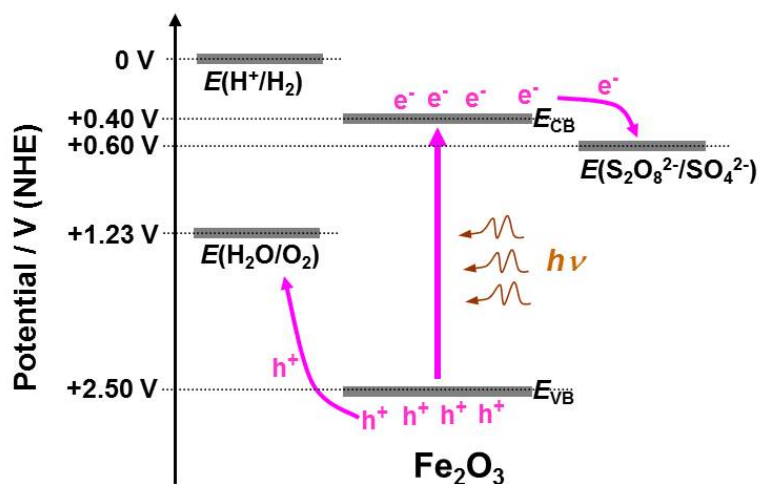

**Figure S7** Schematic energy diagram for photocatalytic water oxidation with 12.6 mM  $\text{Na}_2\text{S}_2\text{O}_8$  (sodium persulfate) as sacrificial electron acceptor. The conduction band edge ( $E_{\text{CB}}$ ) and valence band edge ( $E_{\text{VB}}$ ) of  $\text{Fe}_2\text{O}_3$  photocatalyst at pH=7 was set at +0.4 V and +2.5 V vs. NHE, respectively.<sup>[1]</sup> The thermodynamic oxidation potential of water and reduction potential of persulfate at pH=7 was set at +1.23 V<sup>[2]</sup> and +0.6 V vs. NHE<sup>[3]</sup>, respectively.

Ref:

[1] T. K. Townsend, E. M. Sabio, N. D. Browningbc and F. E. Osterloh, *Energy Environ. Sci.*, **2011**, 4, 4270.

[2] X. Chen, S. Shen, L. Guo, and S. S. Mao, *Chem. Rev.* **2010**, 110, 6503.

[3] F. A. Frame, T. K. Townsend, R. L. Chamousis, E. M. Sabio, T. Dittrich, N. D. Browning and F. E. Osterloh, *J. Am. Chem. Soc.* **2011**, 133, 7264.

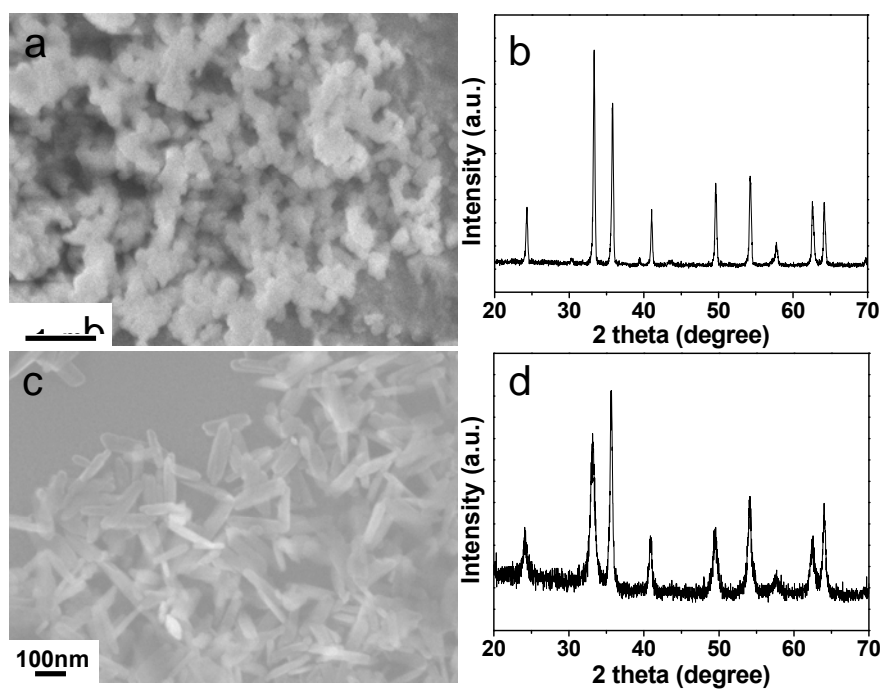

**Figure S8** FESEM images and XRD patterns of (a-b) commercially-purchased Fe<sub>2</sub>O<sub>3</sub> nanoparticles and (c-d) as-prepared Fe<sub>2</sub>O<sub>3</sub> nanorods

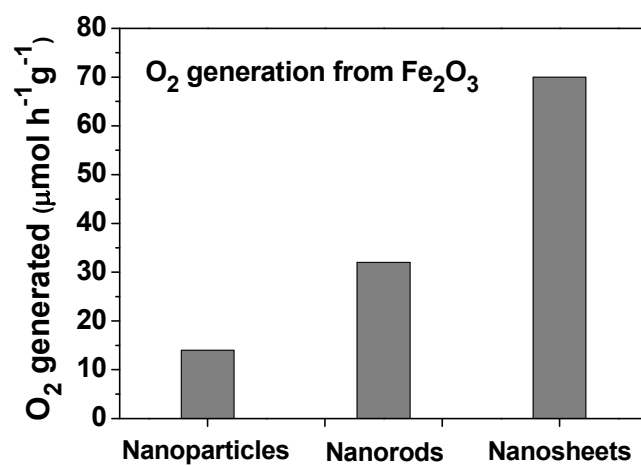

**Figure S9** comparison of O<sub>2</sub> evolution of hierarchical hollow Fe<sub>2</sub>O<sub>3</sub> spheres, as-prepared Fe<sub>2</sub>O<sub>3</sub> nanorods and commercially-purchased Fe<sub>2</sub>O<sub>3</sub> nanoparticles at room temperature
